# Supplementary material for: Photoinduced electron transfer from carbon nanotubes to fullerenes: C60versus C70
Source: Royal Society of Chemistry journal article supplement (doi:10.1039/d0cp03622f), 2020-01-01
Supplement: d0cp03622f1.pdf [file d0cp03622f1.pdf]

**Electronic Supplementary Information:**

**Photoinduced Electron Transfer from Carbon Nanotubes  
to Fullerenes: C<sub>60</sub> versus C<sub>70</sub>**

Jia-Jia Yang<sup>1</sup>, Zi-Wen Li<sup>1</sup>, Xiang-Yang Liu<sup>2\*</sup>, Wei-Hai Fang<sup>1</sup>, and Ganglong Cui<sup>1\*</sup>

<sup>1</sup>Key Laboratory of Theoretical and Computational Photochemistry, Ministry of Education, College of Chemistry, Beijing Normal University, Beijing 100875, China and <sup>2</sup>College of Chemistry and Material Science, Sichuan Normal University, Chengdu 610068, China

**Email:** E-mail: xiangyangliu@sicnu.edu.cn; ganglong.cui@bnu.edu.cn

## Simulation Methods

### Nonadiabatic Dynamics Methods

Nonadiabatic carrier transfer dynamics simulations are carried out using Tully's fewest-switches surface-hopping methods based on density functional theory. [1-4] Time-dependent density functional theory in Kohn-Sham framework maps an interacting many-body system onto a system of noninteracting particles in which their electron densities equals to each other. As a result, time-dependent charge density  $\rho(r, t)$  of an interacting system is obtained from a set of time-dependent Kohn-Sham orbitals  $\psi_p(r, t)$  [5-9]

$$\rho(r, t) = \sum_{p=1}^{N_e} |\psi_p(r, t)|^2$$

Electron density evolution finally leads to a set of single-electron equations for evolution of Kohn-Sham orbitals  $\psi_p(r, t)$  [10-14]

$$i\hbar \frac{\partial \psi_p(r, t)}{\partial t} = \hat{H}(r; R) \psi_p(r, t) \quad p = 1, 2, \dots, N_e$$

If expanding time-dependent electron or hole wavefunction  $\psi_p(r, t)$  in terms of interested unoccupied or occupied adiabatic Kohn-Sham orbitals  $\phi_k(r, t)$  calculated from density functional theory calculations along adiabatic molecular dynamics trajectories

$$\psi_p(r, t) = \sum_k c_k(t) \phi_k(r; R)$$

one can obtain a set of equations of motion for expanding coefficients  $c_j(t)$

$$i\hbar \frac{\partial c_j(t)}{\partial t} = \sum_k c_k(t) (\varepsilon_k \delta_{jk} - i\hbar d_{jk})$$

where  $\varepsilon_k$  is energy of  $k$ th adiabatic state and  $d_{jk}$  is nonadiabatic coupling between adiabatic states  $j$  and  $k$ . The former is directly obtained from density functional theory calculations and the latter is calculated numerically through finite difference methods as overlaps of adiabatic states at times  $t$  and  $t + \Delta t$ :

$$d_{jk} = \left\langle \phi_j(r; R) \left| \frac{\partial \phi_k(r; R)}{\partial t} \right. \right\rangle \approx \frac{\langle \phi_j(t) | \phi_k(t + \Delta t) \rangle - \langle \phi_j(t + \Delta t) | \phi_k(t) \rangle}{2\Delta t}$$

in which  $\phi_j(t)$  and  $\phi_k(t + \Delta t)$  are wave functions of adiabatic states  $j$  and  $k$  at times  $t$  and  $t + \Delta t$ , respectively. Previous algorithms are primarily implemented with plane wave basis sets; [15-16] instead, we have recently implemented this nonadiabatic electron or hole dynamics method with Gaussian basis sets with CP2K [17-18] and have successfully applied to studying many materials. [19-22]

### Carrier Transfer Analysis

To estimate electron or hole transfer from one to another fragment in nonadiabatic dynamics simulations, we have developed an efficient density-matrix based method. First, we can define a density matrix  $D$  in terms of atomic orbitals  $\chi_\mu$

$$D_{\mu\nu i}(t) = p_i(t)\chi_{\mu i}\chi_{\nu i}^*$$

in which  $p_i(t)$  is time-dependent occupation number of the  $i$ th adiabatic state calculated on the basis of above expanding coefficients  $c_i(t)$ ;  $\chi_{\mu i}$  is the  $\mu$ th atomic orbital coefficient of the  $i$ th adiabatic state. Similar to Mulliken charge analysis, [23] we have then defined a population matrix  $P$  using density matrix  $D$  and atomic overlap matrix  $S$

$$P_{\mu\nu i} = D_{\mu\nu i}S_{\mu\nu}$$

Finally, we can obtain the  $a$ th atomic charge through summing all basis functions  $\mu$  belonging to that atom and all involved adiabatic states  $i$

$$P_a = \sum_i \left( \sum_{\mu \in a, \nu \in a} P_{\mu\nu i} + \frac{1}{2} \left( \sum_{\mu \in a, \nu \notin a} P_{\mu\nu i} + \sum_{\mu \notin a, \nu \in a} P_{\mu\nu i} \right) \right)$$

It should be noted that if only an atomic orbital belongs to the  $a$ th atom, just half of  $P_{\mu\nu i}$  is used, as done by Mulliken charge analysis method. [21] Accordingly, total electron on a fragment A is done by summing all atomic charges belonging to that fragment

$$P_A = \sum_i p_i(t)P_{Ai}$$

in which

$$P_{Ai} = \sum_{a \in A} \left( \sum_{\mu \in a, \nu \in a} \chi_{\mu i} \chi_{\nu i}^* S_{\mu\nu} + \frac{1}{2} \left( \sum_{\mu \in a, \nu \notin a} \chi_{\mu i} \chi_{\nu i}^* S_{\mu\nu} + \sum_{\mu \notin a, \nu \in a} \chi_{\mu i} \chi_{\nu i}^* S_{\mu\nu} \right) \right)$$

In such a case, the differentiation of  $P_A$  is then derived as

$$dP_A = d \left( \sum_i c_i^* c_i P_{Ai} \right) = \sum_i (d(c_i^* c_i) P_A + c_i^* c_i dP_{Ai})$$

in which the first term has variational occupations for adiabatic states  $i$  and the second term has constant adiabatic state occupations but changeable electron population. These two terms correspond to nonadiabatic and adiabatic electron transfer contributions. The former is mainly caused by state hoppings between different adiabatic states and the latter is primarily originated from changes of adiabatic states induced by atomic motions. Finally, it should be noted that Gaussian basis sets are used in our simulations, so molecular coefficients  $\chi_{\mu i}$  are real numbers. Adiabatic states' expanding coefficients  $c_i(t)$  are complex numbers, but they are not directly used; instead, their  $c_i(t)c_i^*(t)$  products are used for calculating time-dependent occupation number  $p_i(t)$  of the  $i$ th adiabatic state, which is a real number.

## Additional Figures

### PDOS Calculated at HSE06+D3 Level

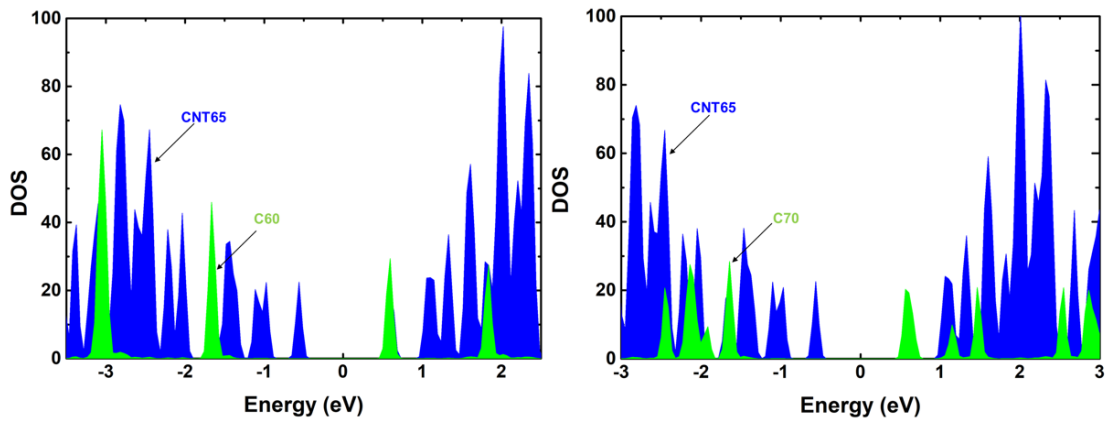

**Figure S1:** HSE06+D3 calculated projected density of states (PDOS) of C60@CNT65 (left) and C70@CNT65 (right).

## Relevant Frontier States

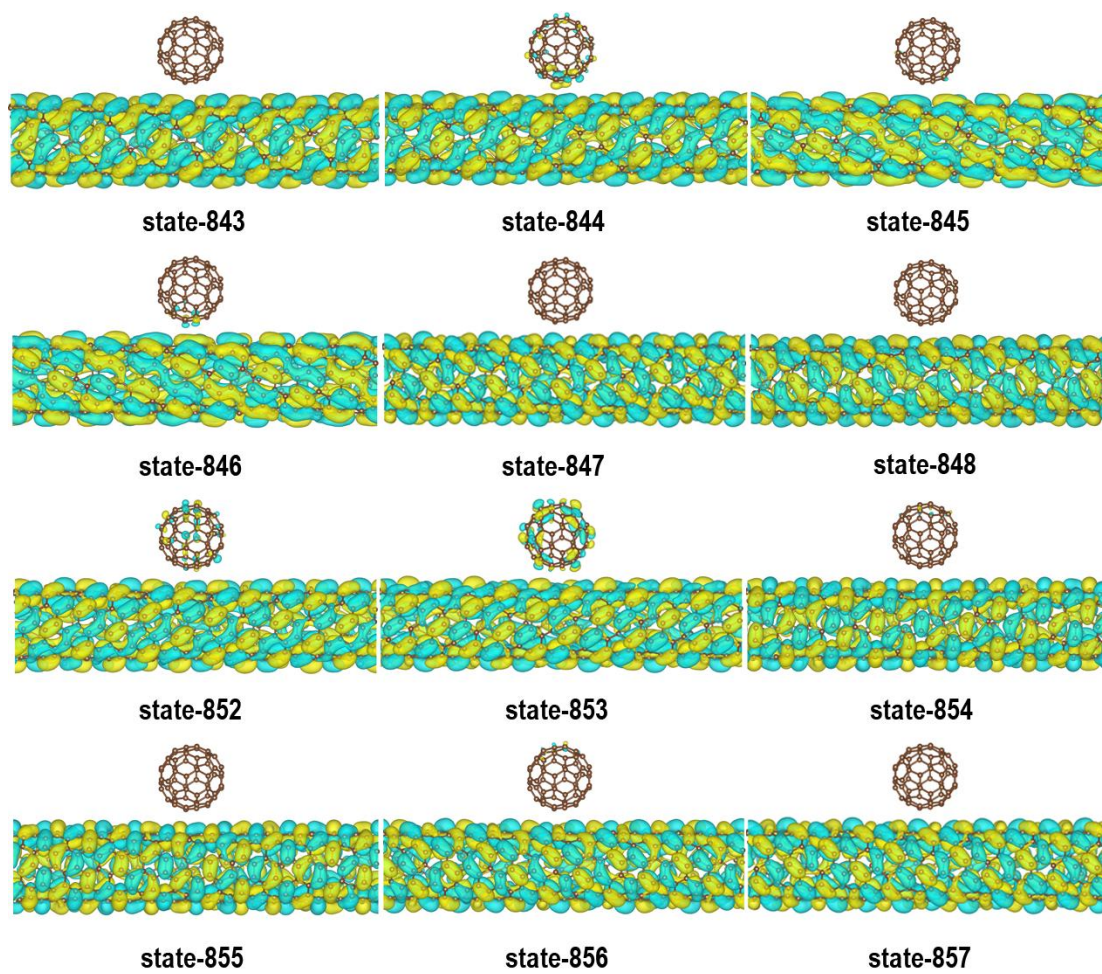

**Figure S2:** Frontier states of C60@CNT65 relevant to interfacial electron transfer dynamics.

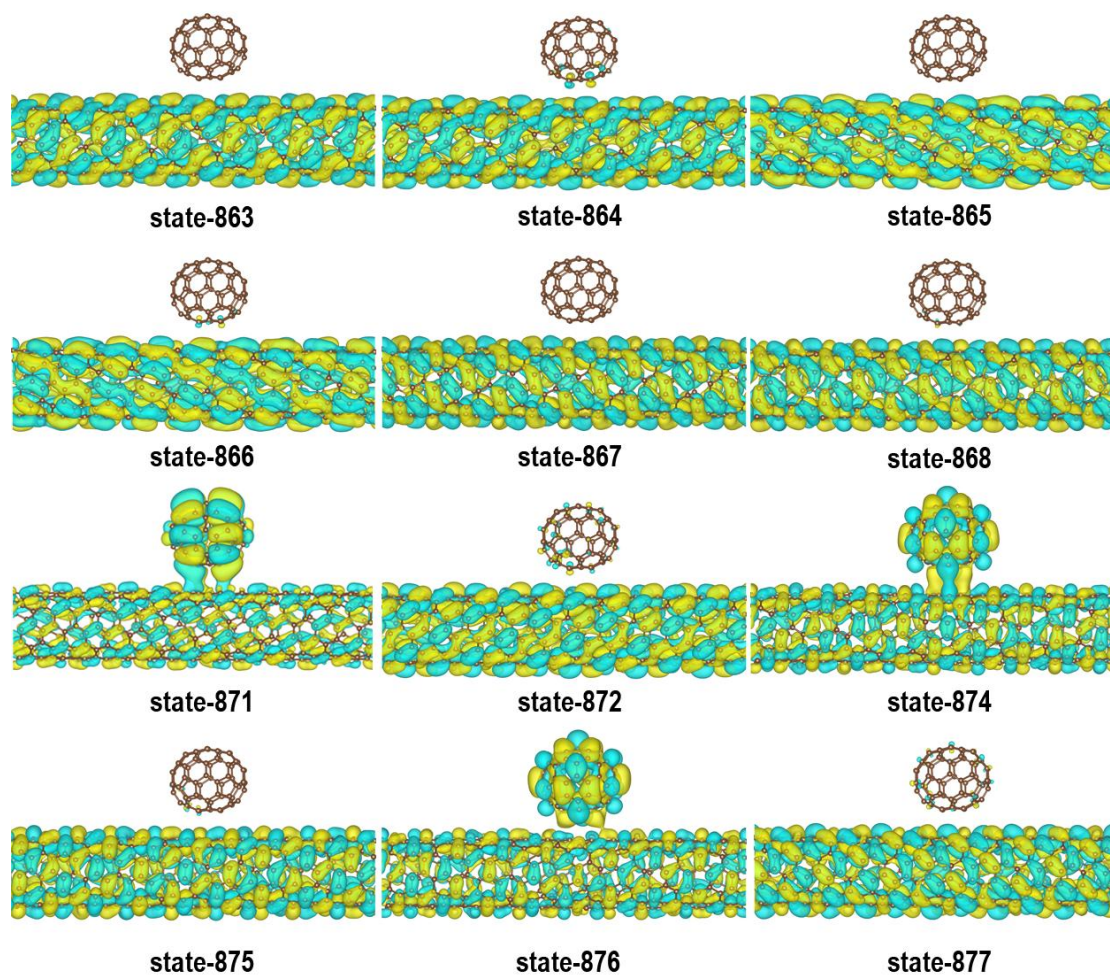

**Figure S3:** Frontier states of C70@CNT65 relevant to interfacial electron transfer dynamics.

## Additional Tables

**Table S1:** Oscillator Strengths and Energies of All Excitations between Relevant Molecular Orbital Pairs in C60@CNT65 Calculated at PBE+D3 Level.

| Transition (OK) | Osc. | Energy (eV) |
|-----------------|------|-------------|
| 848 → 852       | 0.75 | 0.93        |
| 847 → 852       | 1.93 | 0.93        |
| 848 → 853       | 1.91 | 0.93        |
| 847 → 853       | 0.75 | 0.93        |
| 844 → 856       | 0.56 | 1.83        |
| 844 → 857       | 0.71 | 1.84        |
| 843 → 856       | 0.71 | 1.84        |
| 843 → 857       | 0.57 | 1.84        |
| 840 → 860       | 0.64 | 2.27        |
| 839 → 861       | 0.85 | 2.28        |

**Table S3:** Oscillator Strengths and Energies of All Excitations between Relevant Molecular Orbital Pairs in C70@CNT65 Calculated at PBE+D3 Level.

| Transition (OK) | Osc. | Energy (eV) |
|-----------------|------|-------------|
| 868 → 872       | 0.94 | 0.93        |
| 867 → 872       | 1.77 | 0.93        |
| 868 → 873       | 1.25 | 0.94        |
| 867 → 873       | 0.60 | 0.94        |
| 864 → 877       | 0.74 | 1.84        |
| 864 → 878       | 0.53 | 1.84        |
| 863 → 877       | 0.53 | 1.84        |
| 863 → 878       | 0.72 | 1.84        |
| 859 → 881       | 0.69 | 2.28        |
| 860 → 882       | 0.77 | 2.28        |

## References

1. C. F. Craig, W. R. Duncan, O. V. Prezhdo, Trajectory Surface Hopping in the Time-Dependent Kohn-Sham Approach for Electron Nuclear Dynamics. *Phys. Rev. Lett.*, 2005, **95**, 163001.
2. J. C. Tully, R. K. Preston, Trajectory Surface Hopping Approach to Nonadiabatic Molecular Collisions: Reaction of H<sup>+</sup> with D<sub>2</sub>. *J. Chem. Phys.*, 1971, **55**, 562-572.
3. S. Hammes-Schiffer, J. C. Tully, Proton Transfer in Solution: Molecular Dynamics

- with Quantum Transitions. *J. Chem. Phys.*, 1994, **101**, 4657–4667.
4. A. V. Akimov, A. J. Neukirch, O. V. Prezhdo, Theoretical Insights into Photoinduced Charge Transfer and Catalysis at Oxide Interfaces. *Chem. Rev.*, 2013, **113**, 4496–4565.
  5. P. Hohenberg, W. Kohn, Inhomogeneous Electron Gas. *Phys. Rev.*, 1964, **136**, B864–B871.
  6. W. Kohn, L. J. Sham, Self-Consistent Equations Including Exchange and Correlation Effects. *Phys. Rev.*, 1965, **140**, A1133–A1138.
  7. R. G. Parr, W. T. Yang, Density-Functional Theory of Atoms and Molecules; *Oxford University Press*, 1994.
  8. K. Fiolhais, F. Nogueira, M. Marques, A Primer in Density Functional Theory; *Springer: Berlin*, 2003.
  9. M. A. L. Marques, C. A. Ullrich, F. Nogueira, A. Rubio, K. Burke, E. K. U. Gross, Time-dependent Density Functional Theory; *Springer: Berlin*, 2006.
  10. I. Franco, S. Tretiak, Electron-Vibrational Dynamics of Photoexcited Polyfluorenes. *J. Am. Chem. Soc.*, 2004, **126**, 12130–12140.
  11. M. A. L. Marques, E. K. U. Gross, Time-Dependent Density Functional Theory. *Annu. Rev. Phys. Chem.*, 2004, **55**, 427–455.
  12. M. A. L. Marques, X. López, D. Varsano, A. Castro, A. Rubio, Time-Dependent Density-Functional Approach for Biological Chromophores: The Case of the Green Fluorescent Protein. *Phys. Rev. Lett.*, 2003, **90**, 258101.
  13. S. Tretiak, K. Igumenshchev, V. Chernyak, Exciton Sizes of Conducting Polymers Predicted by Time-Dependent Density Functional Theory. *Phys. Rev. B: Condens. Matter Mater. Phys.*, 2005, **71**, 033201.
  14. Baer, R.; Seideman, T.; Ilani, S.; Neuhauser, D. Ab Initio Study of the Alternating Current Impedance of a Molecular Junction. *J. Chem. Phys.*, 2004, **120**, 3387–3396.
  15. A. V. Akimov, O. V. Prezhdo, Nonadiabatic Dynamics of Charge Transfer and Singlet Fission at the Pentacene/C<sub>60</sub> Interface. *J. Am. Chem. Soc.*, 2014, **136**, 1599–1608.



16. A. V. Akimov, O. V. Prezhdo, The PYXAID Program for Nonadiabatic Molecular Dynamics in Condensed Matter Systems. *J. Chem. Theory Comput.*, 2013, **9**, 4959-4972.
17. J. Hutter, M. Iannuzzi, F. Schiffmann, J. VandeVondele, CP2K: Atomistic Simulations of Condensed Matter Systems. *WIREs Comput. Mol. Sci.*, 2014, **4**, 15-25.
18. J. VandeVondele, M. Krack, F. Mohamed, M. Parrinello, T. Chassaing, J. Hutter, QUICKSTEP: Fast and Accurate Density Functional Calculations Using a Mixed Gaussian and Plane Waves Approach. *Comput. Phys. Commun.*, 2005, **167**, 103-128.
19. X.-Y. Liu, X.-Y. Xie, W.-H. Fang, G. L. Cui, Theoretical Insights into Interfacial Electron Transfer between Zinc Phthalocyanine and Molybdenum Disulfide. *J. Phys. Chem. A*, 2018, **122**, 9587-9596.
20. X.-Y. Liu, W.-K. Chen, W.-H. Fang, G. L. Cui, Nonadiabatic Dynamics Simulations Reveal Distinct Effects of the Thickness of PTB7 on Interfacial Electron and Hole Transfer Dynamics in PTB7@MoS<sub>2</sub> Heterostructures. *J. Phys. Chem. Lett.*, 2019, **10**, 2949-2956.
21. X.-Y. Xie, X.-Y. Liu, Q. Fang, W.-H. Fang, G. L. Cui, Photoinduced Carrier Dynamics at the Interface of Pentacene and Molybdenum Disulfide. *J. Phys. Chem. A*, 2019, **123**, 7693-7703.
22. J.-J. Yang, X.-Y. Liu, W.-H. Fang, D. Xiao, G. L. Cui, Photoinduced Carrier Dynamics at the Interface of Black Phosphorus and Bismuth Vanadate. *J. Phys. Chem. A*, 2019, **123**, 10019-10029.
23. R. S. Mulliken, Electronic Population Analysis on LCAO-MO Molecular Wave Functions. I. *J. Chem. Phys.*, 1955, **23**, 1833-1840.
